# Supplementary material for: Phenotypic and clinical characterization of low density neutrophils in patients with advanced lung adenocarcinoma
Source: PubMed Central journal article supplement (PMC5710898; doi:10.18632/oncotarget.18771), 2017-06-28
Supplement: oncotarget-08-90969-s001.pdf [file oncotarget-08-90969-s001.pdf]

## Phenotypic and clinical characterization of low density neutrophils in patients with advanced lung adenocarcinoma

### Supplementary Materials

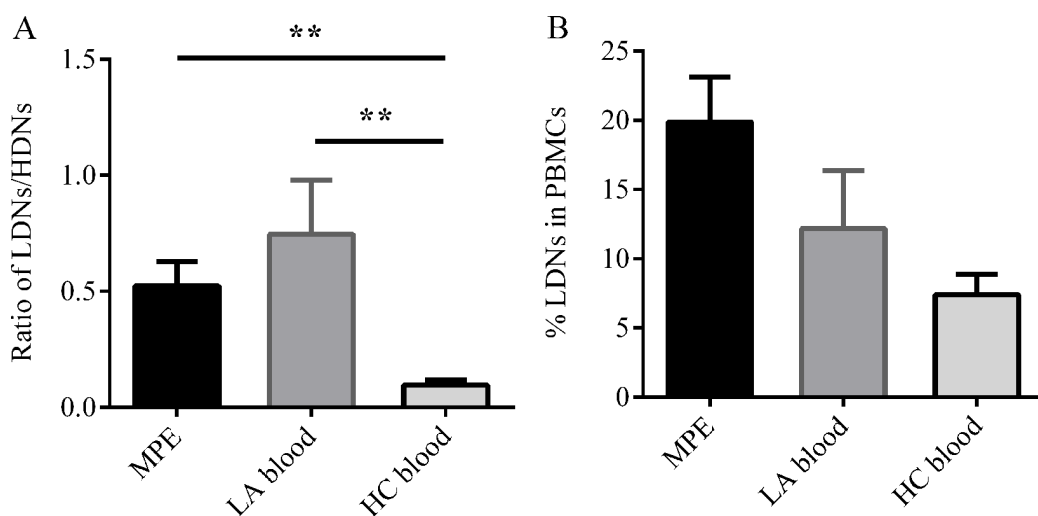

**Supplementary Figure 1: Ratio of LDNs/HDNs and percentage of LDNs in PBMCs analyzed in malignant pleural effusion (MPE  $n = 4$ ) and blood of lung adenocarcinoma (LA) patients, and blood of healthy controls (HC). LA patients include untreated and recurrent groups. Statistical significance was determined by a two-tailed Kruskal-Wallis test.  $**P < 0.01$ .**
